# Supplementary figures and images for: Viral Metagenomics Revealed Sendai Virus and Coronavirus Infection of Malayan Pangolins (Manis javanica)
Source: MDPI journal article supplement (doi:10.3390/v11110979), 2019-10-24

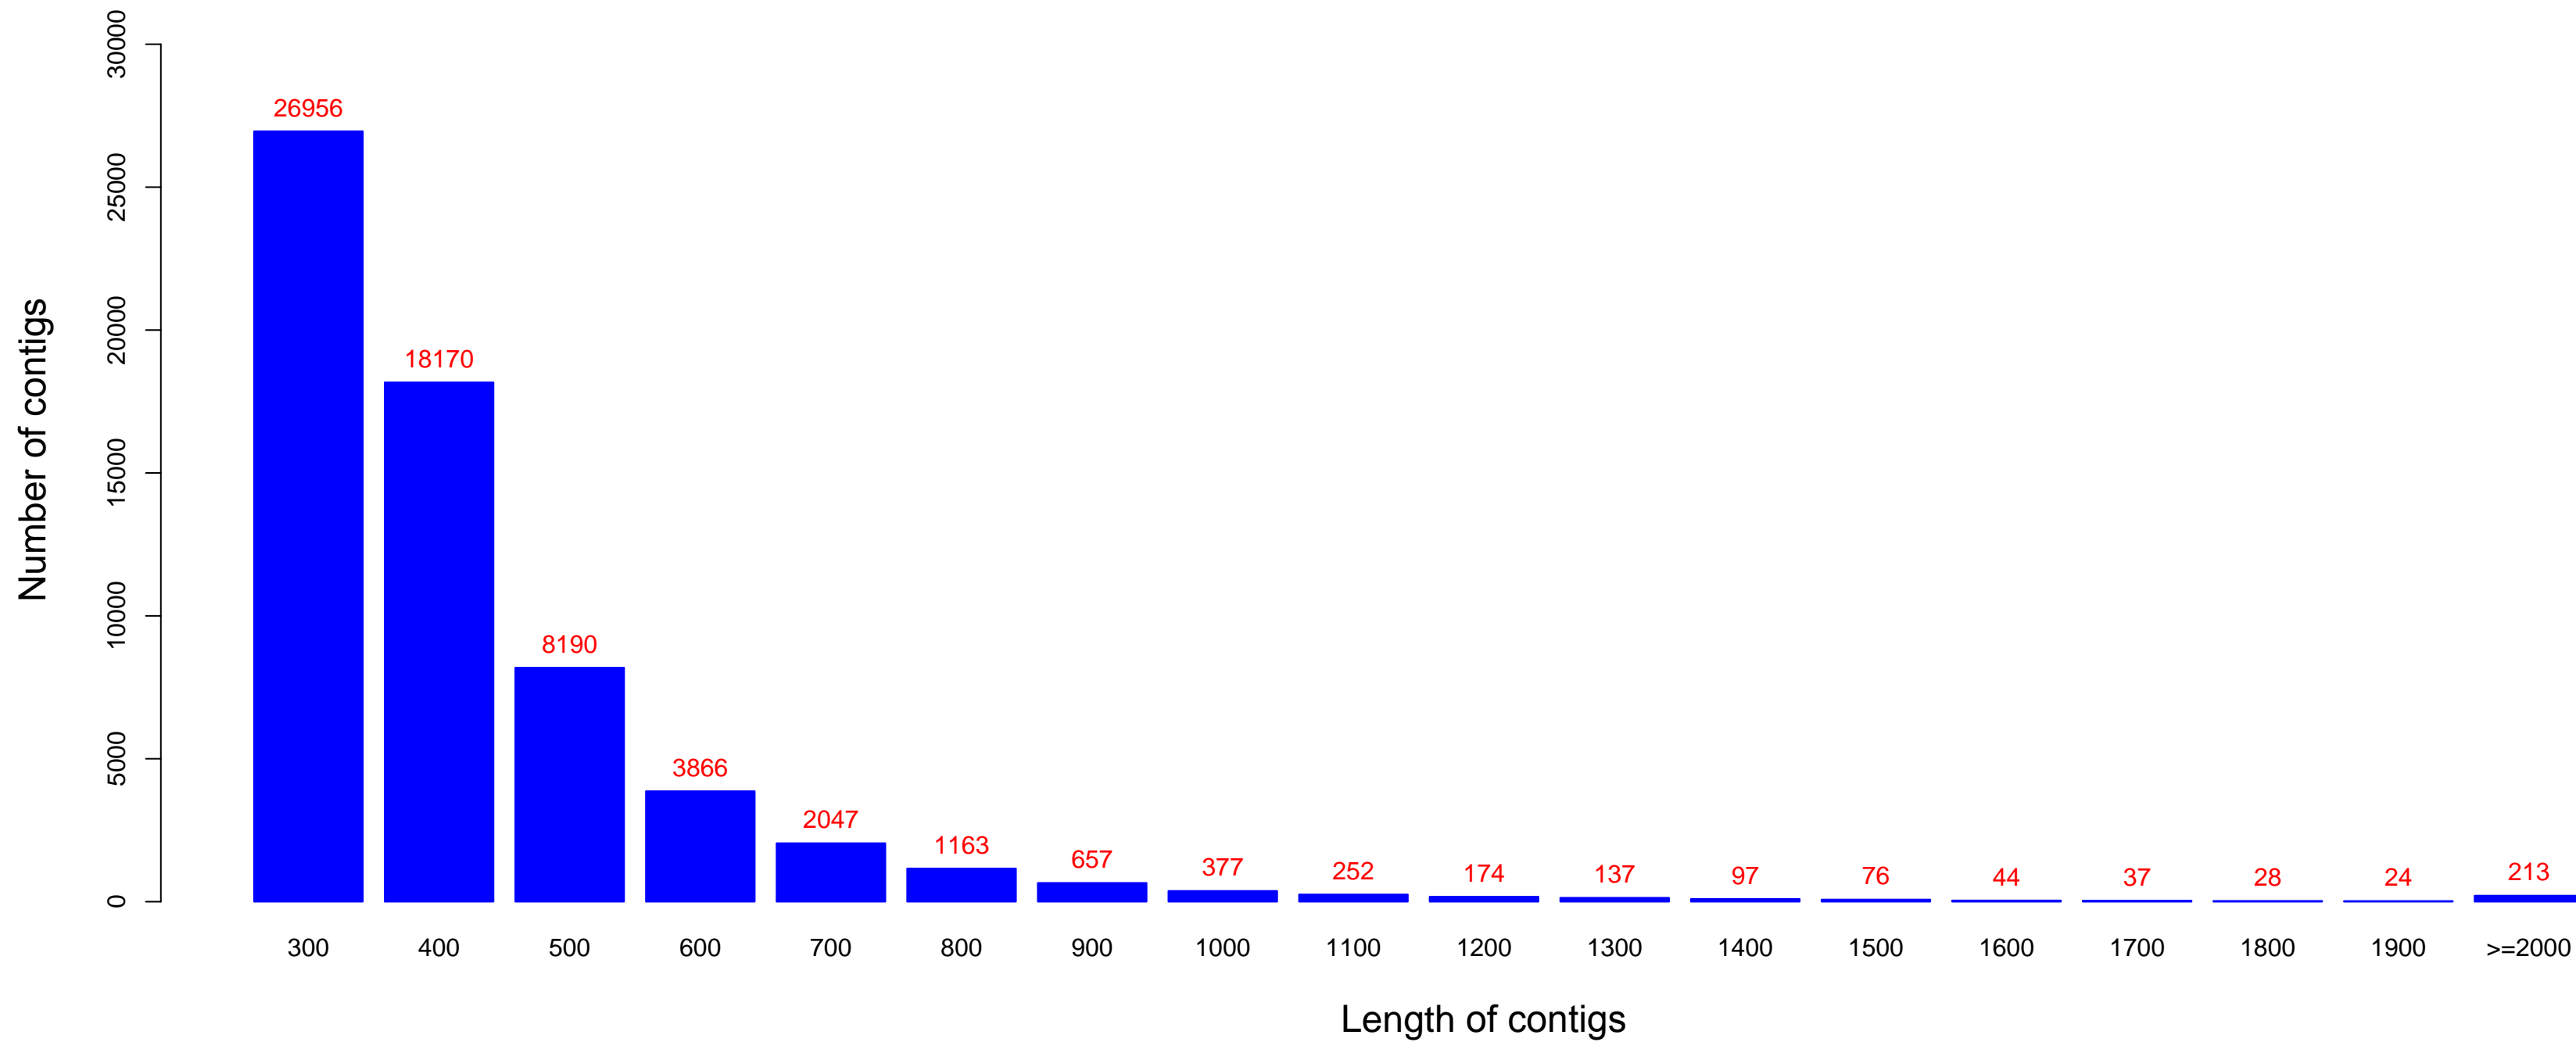

Supplement: s1 [file s1]
